# Supplementary material
Source: HighWire-hosted journal article supplement (https://ajnr-sso.highwirestaging.com/highwire/filestream/52394/field_highwire_adjunct_files/0/3589_table.pdf)
Supplement: 3589_table.pdf [file 3589_table.pdf]

**On-line Table: Evaluation of imaging characteristics in vitro and in vivo**

| Imaging Modality                   | Standard Platinum Coils | Polymeric Coils |             |
|------------------------------------|-------------------------|-----------------|-------------|
|                                    | In Vitro                | In Vitro        | In Vivo     |
| DSA                                |                         |                 |             |
| Transparency                       | Not transparent         | Transparent     | Transparent |
| Visibility of superimposed vessels | Not visible             | Visible         | Visible     |
| Flat panel CT                      |                         |                 |             |
| Embolic mass                       | Not acceptable          | Acceptable      |             |
| Individual coils                   | Not acceptable          | Not acceptable  |             |
| Artifact production                | Major                   | Minor           |             |
| Peri-aneurysmal area               | Not acceptable          | Not acceptable  |             |
| CT                                 |                         |                 |             |
| Embolic mass                       | Not acceptable          | Acceptable      | Acceptable  |
| Individual coils                   | Not acceptable          | Acceptable      | Acceptable  |
| Artifact production                | Major                   | Minor           | Minor       |
| Peri-aneurysmal area               | Not acceptable          | Acceptable      | Acceptable  |
| CTA                                |                         |                 |             |
| Embolic mass                       |                         |                 | Acceptable  |
| Individual coils                   |                         |                 | Acceptable  |
| Artifact production                |                         |                 | Minor       |
| Peri-aneurysmal area               |                         |                 | Acceptable  |
| Flow in sac                        |                         |                 | Acceptable  |
| MRI                                |                         |                 | Acceptable  |
| B0                                 | Artifact production     | Minor           | None        |
| TIWI                               |                         |                 |             |
| Embolic mass                       | Acceptable              | Excellent       | Excellent   |
| Individual coils                   | Not acceptable          | Acceptable      | Acceptable  |
| Artifact production                | Minor                   | None            | None        |
| Peri-aneurysmal area               | Acceptable              | Excellent       | Excellent   |
| T2WI                               |                         |                 |             |
| Embolic mass                       | Acceptable              | Excellent       | Excellent   |
| Individual coils                   | Not acceptable          | Excellent       | Excellent   |
| Artifact production                | Minor                   | None            | None        |
| Peri-aneurysmal area               | Acceptable              | Excellent       | Excellent   |
| TRUFI                              |                         |                 |             |
| Embolic mass                       | Acceptable              | Excellent       |             |
| Individual coils                   | Not acceptable          | Excellent       |             |
| Artifact production                | Minor                   | None            |             |
| Peri-aneurysmal area               | Acceptable              | Excellent       |             |
| TOF                                |                         |                 |             |
| Embolic mass                       | Acceptable              | Excellent       | Excellent   |
| Individual coils                   | Not acceptable          | Excellent       | Excellent   |
| Artifact production                | Minor                   | None            | None        |
| Peri-aneurysmal area               | Acceptable              | Excellent       | Excellent   |
| Flow in sac                        | Acceptable              | Excellent       | Excellent   |
| Flow in neck                       | Acceptable              | Excellent       | Excellent   |

**Note:**—TRUFI indicates true fast imaging with steady state precession.
